# Supplementary material
Source: Research Square preprint supplement (doi:10.21203/rs.3.rs-9884337/v1)
Supplement: Supplementary file 1 [file 80cd24384681c4160bbdef1e.docx]

**Table. S1** 7 global air-sea turbulent flux products used in the study.

| Air-sea turbulent flux datasets | | | | |
| --- | --- | --- | --- | --- |
| Type | Name | Time coverage | Spatial resolution | Data access website |
| Atmosphere reanalysis | ERA5 | 1993-2024 | (0.25,0.25) | https://cds.climate.copernicus.eu/ |
| CFSR | 1993-2010 | (0.312,0.312) | https://gdex.ucar.edu/datasets/d093000/ |
| CFSv2 | 2011-2024 | (0.204 | https://gdex.ucar.edu/datasets/d094000/ |
| MERRA-2 | 1993-2024 | (0.625,0.5 | https://disc.gsfc.nasa.gov/datasets?project=MERRA-2 |
| SeaFluxV3 | 1993-2018 | (25km,25km) | https://www.earthdata.nasa.gov/data/catalog/ghrc-daac-seaflux-1 |
| Machine learning | OHFv2 | 1993-2020 | (0.25,0.25) | https://www.ncei.noaa.gov/products/climate-data-records/ocean-heat-fluxes |
| Hybrid | GHFD | 1993-2023 | (0.25,0.25) | https://www.scidb.cn/detail?dataSetId=a86fae1daac640f0bd925060b6129761 |
